# Supplementary material
Source: PubMed Central journal article supplement (PMC6649853)
Supplement: pky064_supp.pdf [file pky064_supp.pdf]

**Supplemental Table 1. Sociodemographic and Clinical Characteristics at Baseline: for Participants with Chronic Pain (Defined as Visual Analog Scale  $\geq 3$  at Baseline)**

|                                   | <b>Relaxing<br/>Acupressure<br/>(n=74)</b> | <b>Stimulating<br/>Acupressure<br/>(n=58)</b> | <b>Usual<br/>Care<br/>(n=61)</b> |
|-----------------------------------|--------------------------------------------|-----------------------------------------------|----------------------------------|
| <b>Demographics</b>               |                                            |                                               |                                  |
| Age (mean years) $\pm$ SD         | 59.2 $\pm$ 9.3                             | 60.8 $\pm$ 10.3                               | 61.8 $\pm$ 9.3                   |
| Race n (%)                        |                                            |                                               |                                  |
| White                             | 67 (91)                                    | 50 (86)                                       | 51 (84)                          |
| <b>Clinical Characteristics</b>   |                                            |                                               |                                  |
| BFI (mean $\pm$ SD) <sup>1</sup>  | 5.2 $\pm$ 1.5                              | 5.4 $\pm$ 1.5                                 | 5.2 $\pm$ 1.4                    |
| BPI (mean $\pm$ SD) <sup>1</sup>  |                                            |                                               |                                  |
| Severity                          | 4.8 $\pm$ 1.7                              | 4.6 $\pm$ 1.8                                 | 4.4 $\pm$ 1.9                    |
| Interference                      | 3.9 $\pm$ 2.2                              | 4.1 $\pm$ 2.3                                 | 3.9 $\pm$ 2.3                    |
| HADS (mean $\pm$ SD) <sup>1</sup> |                                            |                                               |                                  |
| Anxiety                           | 8.0 $\pm$ 4.2                              | 8.7 $\pm$ 3.5                                 | 8.0 $\pm$ 3.9                    |
| Depression                        | 6.1 $\pm$ 3.0                              | 6.9 $\pm$ 3.2                                 | 6.0 $\pm$ 3.4                    |
| Stage of Cancer n (%)             |                                            |                                               |                                  |
| Stage 0 <sup>2</sup>              | 15 (20)                                    | 9 (16)                                        | 19 (31)                          |
| Stage 1                           | 22 (30)                                    | 21 (36)                                       | 21 (34)                          |
| Stage 2                           | 21 (28)                                    | 19 (33)                                       | 8 (13)                           |
| Stage 3                           | 11 (15)                                    | 4 (7)                                         | 7 (12)                           |
| Unknown                           | 4 (5)                                      | 4 (7)                                         | 6 (10)                           |
| Estrogen Receptor Status          |                                            |                                               |                                  |
| Yes                               | 47 (64)                                    | 44 (76)                                       | 38 (62)                          |
| No                                | 16 (22)                                    | 6 (10)                                        | 13 (21)                          |
| Unknown                           | 11 (15)                                    | 8 (14)                                        | 10 (16)                          |
| Menopausal Status                 |                                            |                                               |                                  |
| Premenopausal                     | 25 (34)                                    | 20 (35)                                       | 21 (34)                          |

|                                                                   |               |               |               |
|-------------------------------------------------------------------|---------------|---------------|---------------|
| Perimenopausal                                                    | 7 (10)        | 5 (9)         | 4 (7)         |
| Postmenopausal                                                    | 40 (54)       | 33 (57)       | 32 (53)       |
| Unknown                                                           | 2 (3)         | 0 (0)         | 4 (7)         |
| Time Since Cancer Diagnosis in years (mean $\pm$ SD) <sup>3</sup> | 5.1 $\pm$ 2.0 | 5.6 $\pm$ 3.1 | 6.3 $\pm$ 5.7 |
| Treatments (were received) n (%) <sup>4</sup>                     |               |               |               |
| Surgery                                                           | 74 (100)      | 58 (100)      | 60 (98)       |
| Chemotherapy                                                      | 39 (53)       | 26 (45)       | 20 (33)       |
| Radiation                                                         | 54 (73)       | 43 (74)       | 44 (72)       |
| Hormone Therapy                                                   | 46 (62)       | 46 (79)       | 35 (58)       |
| Medications (% taking at baseline)                                |               |               |               |
| Acetaminophen                                                     | 26 (36)       | 16 (28)       | 11 (19)       |
| Anticonvulsants                                                   | 11 (15)       | 9 (16)        | 8 (14)        |
| Aromatase Inhibitors                                              | 13 (18)       | 16 (28)       | 15 (26)       |
| Benzodiazepines                                                   | 10 (14)       | 5 (9)         | 7 (12)        |
| Glucosamine/Chondroitin                                           | 7 (10)        | 3 (5)         | 10 (17)       |
| NDRIs <sup>5</sup>                                                | 2 (3)         | 3 (5)         | 6 (10)        |
| NSAIDs <sup>5</sup>                                               | 48 (67)       | 37 (65)       | 39 (67)       |
| Omega 3s                                                          | 15 (21)       | 24 (42)       | 20 (35)       |
| Opiates & Morphinomimetics                                        | 18 (25)       | 9 (16)        | 7 (12)        |
| SERMs <sup>5</sup>                                                | 8 (11)        | 10 (18)       | 6 (10)        |
| SNRIs <sup>5</sup>                                                | 11 (15)       | 10 (18)       | 8 (14)        |
| SSRIs <sup>5</sup>                                                | 16 (22)       | 11 (19)       | 11 (19)       |
| Tricyclics                                                        | 3 (4)         | 2 (4)         | 3 (5)         |
| Other <sup>6</sup>                                                | 7 (10)        | 5 (9)         | 9 (16)        |

---

<sup>1</sup> BFI=Brief Fatigue Inventory; BPI=Brief Pain Inventory; HADS=Hospital Anxiety and Depression Scale

<sup>2</sup> Stage 0 includes ductal carcinoma in situ (DCIS) and Lobular carcinoma in situ (LCIS)

<sup>3</sup> Time since Cancer Diagnosis” was calculated from on-study date and date of diagnosis in years

<sup>4</sup> Percentages may not add up to 100% because participants can receive multiple treatments or diagnoses

<sup>5</sup> NDRIs=Norepinephrine-Dopamine Reuptake Inhibitors; NSAIDs=Nonsteroidal Anti-Inflammatory Drugs; SERMs=Selective Estrogen Receptor Modulators; SNRIs=Serotonin-Norepinephrine Reuptake Inhibitors; SSRIs=Selective Serotonin Reuptake Inhibitors

<sup>6</sup> Other medications include Trazodone, Lisinopril, Flexeril, Fioricet, Imitrex, Norgesic, Fiorinal, Butalbital, Remeron, Buspirone, Milk Thistle, Ginger Biloba, Medical marijuana, St. John’s Wort, Pramipexole, Requip, Adderall, Buspar, Tamoxifen, Atenolol, Omeprazole, Baby Aspirin, Vitamin D, Vitamin E, and topical Lidocaine

**Supplemental Table 2. Sociodemographic and Clinical Characteristics at Baseline for Participants with Baseline Anxiety (Defined as Hospital Anxiety Depression Sub Scale, Anxiety  $\geq$  8 at Baseline)**

|                                   | Relaxing<br>Acupressure<br>(n= 42) | Stimulating<br>Acupressure<br>(n= 56) | Usual Care<br>(n= 44) |
|-----------------------------------|------------------------------------|---------------------------------------|-----------------------|
| <b>Demographics</b>               |                                    |                                       |                       |
| Age (mean years) $\pm$<br>SD      | 59.0 $\pm$ 9.4                     | 59.9 $\pm$ 9.2                        | 58.6 $\pm$ 9.7        |
| Race n (%)                        | 38 (91)                            | 47 (84)                               | 36 (82)               |
| White                             |                                    |                                       |                       |
| <b>Clinical Characteristics</b>   |                                    |                                       |                       |
| BFI (mean $\pm$ SD) <sup>1</sup>  | 5.4 $\pm$ 1.6                      | 5.3 $\pm$ 1.6                         | 5.1 $\pm$ 1.6         |
| BPI (mean $\pm$ SD) <sup>1</sup>  |                                    |                                       |                       |
| Severity                          | 4.6 $\pm$ 2.1                      | 3.9 $\pm$ 2.2                         | 3.9 $\pm$ 1.9         |
| Interference                      | 4.1 $\pm$ 2.6                      | 3.5 $\pm$ 2.2                         | 3.6 $\pm$ 2.3         |
| HADS (mean $\pm$ SD) <sup>1</sup> |                                    |                                       |                       |
| Anxiety                           | 11.3 $\pm$ 2.9                     | 10.7 $\pm$ 2.3                        | 11.2 $\pm$ 2.9        |
| Depression                        | 7.1 $\pm$ 3.0                      | 8.1 $\pm$ 3.0                         | 7.4 $\pm$ 3.0         |
| Stage of Cancer n (%)             |                                    |                                       |                       |
| Stage 0 <sup>2</sup>              | 9 (21)                             | 12 (22)                               | 17 (39)               |
| Stage 1                           | 14 (33)                            | 20 (36)                               | 11 (25)               |
| Stage 2                           | 9 (21)                             | 15 (27)                               | 8 (18)                |
| Stage 3                           | 6 (14)                             | 4 (7)                                 | 4 (9)                 |
| Unknown                           | 3 (7)                              | 4 (7)                                 | 4 (9)                 |
| Estrogen Receptor Status          |                                    |                                       |                       |
| Yes                               | 25 (60)                            | 37 (66)                               | 28 (64)               |
| No                                | 9 (21)                             | 10 (18)                               | 9 (21)                |
| Unknown                           | 8 (19)                             | 9 (16)                                | 7 (16)                |
| Menopausal Status                 |                                    |                                       |                       |
| Premenopausal                     | 13 (31)                            | 20 (36)                               | 22 (50)               |

|                                                                      |               |               |               |
|----------------------------------------------------------------------|---------------|---------------|---------------|
| Perimenopausal                                                       | 6 (14)        | 5 (9)         | 2 (5)         |
| Postmenopausal                                                       | 21 (50)       | 31 (55)       | 18 (41)       |
| Unknown                                                              | 2 (5)         | 0 (0)         | 2 (5)         |
| Time Since Cancer Diagnosis<br>in years (mean $\pm$ SD) <sup>3</sup> | 5.3 $\pm$ 2.6 | 5.4 $\pm$ 2.7 | 5.2 $\pm$ 4.5 |
| Treatments (were received) n<br>(%) <sup>4</sup>                     |               |               |               |
| Surgery                                                              | 42 (100)      | 56 (100)      | 43 (98)       |
| Chemotherapy                                                         | 22 (52)       | 23 (41)       | 15 (34)       |
| Radiation                                                            | 31 (74)       | 39 (70)       | 28 (64)       |
| Hormone Therapy                                                      | 23 (55)       | 40 (71)       | 26 (61)       |
| Medications (% taking at<br>baseline)                                |               |               |               |
| Acetaminophen                                                        | 12 (30)       | 13 (24)       | 9 (21)        |
| Anticonvulsants                                                      | 7 (18)        | 6 (11)        | 6 (14)        |
| Aromatase Inhibitors                                                 | 5 (13)        | 15 (28)       | 11 (26)       |
| Benzodiazepines                                                      | 9 (23)        | 6 (11)        | 8 (19)        |
| Glucosamine/Chondroitin                                              | 5 (13)        | 3 (6)         | 6 (14)        |
| NDRIs <sup>5</sup>                                                   | 2 (5)         | 6 (11)        | 3 (7)         |
| NSAIDs <sup>5</sup>                                                  | 28 (70)       | 34 (63)       | 30 (71)       |
| Omega 3s                                                             | 3 (8)         | 20 (37)       | 12 (29)       |
| Opiates & Morphinomimetics                                           | 11 (28)       | 8 (15)        | 2 (5)         |
| SERMs <sup>5</sup>                                                   | 6 (15)        | 10 (19)       | 6 (14)        |
| SNRIs <sup>5</sup>                                                   | 6 (15)        | 12 (22)       | 6 (14)        |
| SSRIs <sup>5</sup>                                                   | 8 (20)        | 10 (19)       | 12 (29)       |
| Tricyclics                                                           | 1 (3)         | 2 (4)         | 3 (7)         |
| Other <sup>6</sup>                                                   | 4 (10)        | 6 (11)        | 5 (12)        |

---

<sup>1</sup> BFI=Brief Fatigue Inventory; BPI=Brief Pain Inventory; HADS=Hospital Anxiety and Depression Scale

<sup>2</sup> Stage 0 includes ductal carcinoma in situ (DCIS) and Lobular carcinoma in situ (LCIS)

<sup>3</sup> Time since Cancer Diagnosis” was calculated from on-study date and date of diagnosis in years

<sup>4</sup> Percentages may not add up to 100% because participants can receive multiple treatments or diagnoses

<sup>5</sup> NDRIs=Norepinephrine-Dopamine Reuptake Inhibitors; NSAIDs=Nonsteroidal Anti-Inflammatory Drugs; SERMs=Selective Estrogen Receptor Modulators; SNRIs=Serotonin-Norepinephrine Reuptake Inhibitors; SSRIs=Selective Serotonin Reuptake Inhibitors

<sup>6</sup> Other medications include Trazodone, Lisinopril, Flexeril, Fioricet, Imitrex, Norgesic, Fiorinal, Butalbital, Remeron, Buspirone, Milk Thistle, Ginger Biloba, Medical marijuana, St. John’s Wort, Pramipexole, Requip, Adderall, Buspar, Tamoxifen, Atenolol, Omeprazole, Baby Aspirin, Vitamin D, Vitamin E, and topical Lidocaine

**Supplemental Table 3. Sociodemographic and Clinical Characteristics at Baseline for Participants with Baseline Depression (Defined as Hospital Anxiety Depression Sub Scale, Depression  $\geq 8$  at Baseline)**

|                                   | Relaxing<br>Acupressure<br>(n=27) | Stimulating<br>Acupressure<br>(n=36) | Usual<br>Care<br>(n=29) |
|-----------------------------------|-----------------------------------|--------------------------------------|-------------------------|
| <b>Demographics</b>               |                                   |                                      |                         |
| Age (mean years) $\pm$ SD         | 58.0 $\pm$ 9.9                    | 62.2 $\pm$ 8.6                       | 59.8 $\pm$ 7.8          |
| Race n (%)                        | 25 (93)                           | 29 (81)                              | 23 (79)                 |
| White                             |                                   |                                      |                         |
| <b>Clinical Characteristics</b>   |                                   |                                      |                         |
| BFI (mean $\pm$ SD) <sup>1</sup>  | 5.4 $\pm$ 1.7                     | 5.8 $\pm$ 1.5                        | 5.6 $\pm$ 1.4           |
| BPI (mean $\pm$ SD) <sup>1</sup>  |                                   |                                      |                         |
| Severity                          | 4.6 $\pm$ 2.2                     | 3.7 $\pm$ 2.6                        | 4.3 $\pm$ 1.9           |
| Interference                      | 4.3 $\pm$ 2.5                     | 3.5 $\pm$ 2.5                        | 4.4 $\pm$ 2.4           |
| HADS (mean $\pm$ SD) <sup>1</sup> |                                   |                                      |                         |
| Anxiety                           | 9.6 $\pm$ 3.8                     | 10.5 $\pm$ 3.1                       | 10.2 $\pm$ 4.1          |
| Depression                        | 9.8 $\pm$ 1.8                     | 10.1 $\pm$ 1.8                       | 9.9 $\pm$ 1.8           |
| Stage of Cancer n (%)             |                                   |                                      |                         |
| Stage 0 <sup>2</sup>              | 4 (15)                            | 8 (22)                               | 7 (24)                  |
| Stage 1                           | 12 (44)                           | 14 (39)                              | 8 (28)                  |
| Stage 2                           | 7 (26)                            | 8 (22)                               | 5 (17)                  |
| Stage 3                           | 2 (7)                             | 2 (6)                                | 6 (21)                  |
| Unknown                           | 2 (7)                             | 3 (8)                                | 3 (10)                  |
| Estrogen Receptor Status          |                                   |                                      |                         |
| Yes                               | 16 (59)                           | 23 (64)                              | 20 (69)                 |
| No                                | 6 (22)                            | 6 (17)                               | 6 (21)                  |
| Unknown                           | 5 (19)                            | 7 (19)                               | 3 (10)                  |
| Menopausal Status                 |                                   |                                      |                         |
| Premenopausal                     | 7 (26)                            | 9 (25)                               | 13 (45)                 |

|                                                                   |               |               |               |
|-------------------------------------------------------------------|---------------|---------------|---------------|
| Perimenopausal                                                    | 3 (11)        | 3 (8)         | 4 (14)        |
| Postmenopausal                                                    | 16 (59)       | 24 (67)       | 10 (35)       |
| Unknown                                                           | 1 (4)         | 0 (0)         | 2 (7)         |
| Time Since Cancer Diagnosis in years (mean $\pm$ SD) <sup>3</sup> | 5.4 $\pm$ 2.3 | 4.9 $\pm$ 1.8 | 5.5 $\pm$ 3.5 |
| Treatments (were received) n (%) <sup>4</sup>                     |               |               |               |
| Surgery                                                           | 27 (100)      | 36 (100)      | 28 (97)       |
| Chemotherapy                                                      | 12 (44)       | 14 (39)       | 13 (45)       |
| Radiation                                                         | 18 (67)       | 27 (75)       | 18 (62)       |
| Hormone Therapy                                                   | 17 (63)       | 25 (69)       | 19 (66)       |
| Medications (% taking at baseline)                                |               |               |               |
| Acetaminophen                                                     | 10 (37)       | 11 (31)       | 8 (29)        |
| Anticonvulsants                                                   | 2 (7)         | 5 (14)        | 4 (14)        |
| Aromatase Inhibitors                                              | 4 (15)        | 7 (20)        | 8 (29)        |
| Benzodiazepines                                                   | 2 (7)         | 4 (11)        | 8 (29)        |
| Glucosamine/Chondroitin                                           | 4 (15)        | 2 (6)         | 2 (7)         |
| NDRIs <sup>5</sup>                                                | 0 (0)         | 4 (11)        | 3 (11)        |
| NSAIDs <sup>5</sup>                                               | 18 (67)       | 20 (57)       | 15 (54)       |
| Omega 3s                                                          | 7 (26)        | 14 (40)       | 7 (25)        |
| Opiates & Morphinomimetics                                        | 8 (30)        | 5 (14)        | 2 (7)         |
| SERMs <sup>5</sup>                                                | 4 (15)        | 8 (23)        | 6 (21)        |
| SNRIs <sup>5</sup>                                                | 4 (15)        | 10 (29)       | 6 (21)        |
| SSRIs <sup>5</sup>                                                | 4 (15)        | 9 (26)        | 9 (32)        |
| Tricyclics                                                        | 1 (4)         | 2 (6)         | 2 (7)         |
| Other <sup>6</sup>                                                | 4 (15)        | 4 (11)        | 2 (7)         |



---

<sup>1</sup> BFI=Brief Fatigue Inventory; BPI=Brief Pain Inventory; HADS=Hospital Anxiety and Depression Scale

<sup>2</sup> Stage 0 includes ductal carcinoma in situ (DCIS) and Lobular carcinoma in situ (LCIS)

<sup>3</sup> Time since Cancer Diagnosis” was calculated from on-study date and date of diagnosis in years

<sup>4</sup> Percentages may not add up to 100% because participants can receive multiple treatments or diagnoses

<sup>5</sup> NDRIs=Norepinephrine-Dopamine Reuptake Inhibitors; NSAIDs=Nonsteroidal Anti-Inflammatory Drugs; SERMs=Selective Estrogen Receptor Modulators; SNRIs=Serotonin-Norepinephrine Reuptake Inhibitors; SSRIs=Selective Serotonin Reuptake Inhibitors

<sup>6</sup> Other medications include Trazodone, Lisinopril, Flexeril, Fioricet, Imitrex, Norgesic, Fiorinal, Butalbital, Remeron, Buspirone, Milk Thistle, Ginger Biloba, Medical marijuana, St. John’s Wort, Pramipexole, Requip, Adderall, Buspar, Tamoxifen, Atenolol, Omeprazole, Baby Aspirin, Vitamin D, Vitamin E, and topical Lidocaine

**Supplemental Table 4. Impact of Potential Moderators on Response Self-Acupressure to Patient Reported Outcomes At End of Acupressure Treatment**

| Patient Reported Outcome             | Moderator                          | RA <sup>2</sup> vs UC <sup>2</sup> |                   |                   | SA <sup>2</sup> vs UC <sup>2</sup> |                   |      | SA <sup>2</sup> vs RA <sup>2</sup> |                   |                   |
|--------------------------------------|------------------------------------|------------------------------------|-------------------|-------------------|------------------------------------|-------------------|------|------------------------------------|-------------------|-------------------|
|                                      |                                    | Odds Ratio <sup>3</sup>            | LLCI <sup>2</sup> | ULCI <sup>2</sup> | Odds Ratio <sup>3</sup>            | LLCI <sup>2</sup> | ULCI | Odds Ratio <sup>3</sup>            | LLCI <sup>2</sup> | ULCI <sup>2</sup> |
| <b>Depressive Mood<sup>1</sup></b>   |                                    |                                    |                   |                   |                                    |                   |      |                                    |                   |                   |
|                                      | Anxiety <sup>1</sup>               | 1.04                               | 0.67              | 1.63              | 0.90                               | 0.62              | 1.31 | 0.87                               | 0.56              | 1.35              |
|                                      | Fatigue <sup>1</sup>               | 0.63                               | 0.22              | 1.78              | 0.85                               | 0.32              | 2.29 | 1.36                               | 0.52              | 3.56              |
|                                      | Pain Interference <sup>1</sup>     | 1.13                               | 0.56              | 2.26              | 0.91                               | 0.54              | 1.53 | 0.81                               | 0.42              | 1.55              |
|                                      | Sleep Quality <sup>1</sup>         | 0.80                               | 0.51              | 1.24              | 0.83                               | 0.56              | 1.21 | 1.04                               | 0.71              | 1.52              |
|                                      | Age                                | 0.93                               | 0.78              | 1.11              | 0.99                               | 0.85              | 1.14 | 1.06                               | 0.89              | 1.26              |
|                                      | BMI <sup>2</sup> kg/m <sup>2</sup> | 0.89                               | 0.66              | 1.20              | 0.79                               | 0.62              | 1.01 | 0.89                               | 0.66              | 1.21              |
| <b>Anxiety<sup>1</sup></b>           |                                    |                                    |                   |                   |                                    |                   |      |                                    |                   |                   |
|                                      | Depression <sup>1</sup>            | 1.02                               | 0.67              | 1.55              | 1.08                               | 0.74              | 1.59 | 1.06                               | 0.76              | 1.48              |
|                                      | Fatigue <sup>1</sup>               | 1.22                               | 0.55              | 2.71              | 1.00                               | 0.48              | 2.07 | 0.82                               | 0.39              | 1.71              |
|                                      | Pain Interference <sup>1</sup>     | 1.27                               | 0.77              | 2.09              | 1.22                               | 0.76              | 1.96 | 0.96                               | 0.61              | 1.50              |
|                                      | Sleep Quality <sup>1</sup>         | 1.14                               | 0.83              | 1.56              | 0.97                               | 0.73              | 1.30 | 0.85                               | 0.65              | 1.12              |
|                                      | Age                                | 0.93                               | 0.82              | 1.05              | 0.94                               | 0.83              | 1.06 | 1.02                               | 0.91              | 1.14              |
|                                      | BMI <sup>2</sup> kg/m <sup>2</sup> | 1.04                               | 0.86              | 1.26              | 1.02                               | 0.86              | 1.21 | 0.98                               | 0.83              | 1.17              |
| <b>Sleep Quality<sup>1</sup></b>     |                                    |                                    |                   |                   |                                    |                   |      |                                    |                   |                   |
|                                      | Anxiety <sup>1</sup>               | 0.88                               | 0.61              | 1.26              | 0.87                               | 0.60              | 1.27 | 1.00                               | 0.76              | 1.30              |
|                                      | Depression <sup>1</sup>            | 0.67                               | 0.41              | 1.09              | 0.70                               | 0.43              | 1.14 | 1.04                               | 0.77              | 1.39              |
|                                      | Fatigue <sup>1</sup>               | 0.58                               | 0.25              | 1.35              | 0.50                               | 0.21              | 1.19 | 0.86                               | 0.42              | 1.74              |
|                                      | Pain Interference <sup>1</sup>     | 0.77                               | 0.43              | 1.39              | 0.75                               | 0.42              | 1.33 | 0.97                               | 0.67              | 1.41              |
|                                      | Age                                | 1.03                               | 0.90              | 1.17              | 1.03                               | 0.90              | 1.17 | 1.00                               | 0.91              | 1.11              |
|                                      | BMI <sup>2</sup> kg/m <sup>2</sup> | 0.92                               | 0.72              | 1.16              | 0.91                               | 0.72              | 1.14 | 0.99                               | 0.84              | 1.16              |
| <b>Pain Interference<sup>1</sup></b> |                                    |                                    |                   |                   |                                    |                   |      |                                    |                   |                   |
|                                      | Anxiety <sup>1</sup>               | 1.01                               | 0.82              | 1.26              | 1.17                               | 0.91              | 1.50 | 1.14                               | 0.89              | 1.46              |
|                                      | Depression <sup>1</sup>            | 0.77                               | 0.57              | 1.02              | 0.86                               | 0.64              | 1.15 | 1.09                               | 0.84              | 1.43              |
|                                      | Fatigue <sup>1</sup>               | 0.35                               | 0.15              | 0.85              | 0.46                               | 0.18              | 1.19 | 1.36                               | 0.69              | 2.71              |
|                                      | Sleep Quality <sup>1</sup>         | 0.88                               | 0.71              | 1.11              | 0.87                               | 0.68              | 1.12 | 0.99                               | 0.79              | 1.23              |
|                                      | Age                                | 1.11                               | 1.01              | 1.22              | 1.06                               | 0.96              | 1.17 | 0.95                               | 0.87              | 1.03              |
|                                      | BMI <sup>2</sup> kg/m <sup>2</sup> | 0.92                               | 0.78              | 1.07              | 0.92                               | 0.80              | 1.07 | 1.01                               | 0.88              | 1.16              |
| <b>Fatigue<sup>1</sup></b>           |                                    |                                    |                   |                   |                                    |                   |      |                                    |                   |                   |
|                                      | Anxiety <sup>1</sup>               | 0.93                               | 0.78              | 1.11              | 1.01                               | 0.84              | 1.21 | 1.09                               | 0.90              | 1.33              |
|                                      | Depression <sup>1</sup>            | 0.81                               | 0.64              | 1.02              | 0.85                               | 0.68              | 1.06 | 1.05                               | 0.84              | 1.32              |
|                                      | Pain Interference <sup>1</sup>     | 0.77                               | 0.55              | 1.08              | 0.83                               | 0.59              | 1.16 | 1.08                               | 0.80              | 1.46              |
|                                      | Sleep Quality <sup>1</sup>         | 0.89                               | 0.74              | 1.07              | 0.80                               | 0.65              | 0.99 | 0.91                               | 0.74              | 1.10              |
|                                      | Age                                | 1.1                                | 1.02              | 1.18              | 1.01                               | 0.94              | 1.08 | 0.92                               | 0.86              | 0.98              |
|                                      | BMI <sup>2</sup> kg/m <sup>2</sup> | 0.99                               | 0.88              | 1.12              | 0.95                               | 0.85              | 1.06 | 0.96                               | 0.85              | 1.08              |

1. Patient Reported Outcomes Derived From: Anxiety = Hospital Anxiety Depression Scale Anxiety Subscale; Depression = Hospital Anxiety Depression Scale Depression Subscale; Fatigue = Brief Fatigue Inventory; Pain Interference = Brief Pain Inventory Interference Subscale; and Sleep Quality = Pittsburgh Sleep Quality Global Score.
  2. UC = Usual Care Group; RA = Relaxing Acupressure Group; SA = Stimulating Acupressure Group; LLCI = Lower Limit Confidence Interval; and ULCI = Upper Limit Confidence Interval; BMI = Body Mass Index.
  3. Odds Ratio and Bias Corrected 95 % Confidence Intervals derived from Logistic Regression
- Bolded entries are statistically significant  $p < 0.05$

**Supplemental Table 5. Impact of Potential Mediators of Self-Acupressure on Response to Patient Reported Outcomes At End of Acupressure Treatment<sup>1</sup>**

| Patient Reported Outcome             | Mediator                         | UC <sup>2</sup> vs RA <sup>2</sup> |                   |                   | UC <sup>2</sup> vs SA <sup>2</sup> |                   |       | RA <sup>2</sup> vs SA <sup>2</sup> |                   |                   |
|--------------------------------------|----------------------------------|------------------------------------|-------------------|-------------------|------------------------------------|-------------------|-------|------------------------------------|-------------------|-------------------|
|                                      |                                  | Estimate <sup>3</sup>              | LLCI <sup>2</sup> | ULCI <sup>2</sup> | Estimate <sup>3</sup>              | LLCI <sup>2</sup> | ULCI  | Estimate <sup>3</sup>              | LLCI <sup>2</sup> | ULCI <sup>2</sup> |
| <b>Depressive Mood<sup>1</sup></b>   |                                  |                                    |                   |                   |                                    |                   |       |                                    |                   |                   |
|                                      | Δ Anxiety <sup>2</sup>           | 1.08                               | 0.12              | 7918.05           | 0.98                               | 0.08              | 2.48  | 1.00                               | 0.04              | 10.70             |
|                                      | Δ Fatigue <sup>2</sup>           | 0.73                               | 0.00              | 61.65             | 0.61                               | 0.00              | 1.95  | 1.04                               | 0.00              | 5123.02           |
|                                      | Δ Pain Interference <sup>2</sup> | 1.11                               | 0.14              | 12315.33          | 1.08                               | 0.48              | 7.97  | 0.82                               | 0.01              | 261.81            |
|                                      | Δ Sleep Quality <sup>2</sup>     | 1.06                               | 0.09              | 88.68             | 1.06                               | 0.71              | 19.79 | 1.76                               | 0.05              | 69.24             |
| <b>Anxiety<sup>1</sup></b>           |                                  |                                    |                   |                   |                                    |                   |       |                                    |                   |                   |
|                                      | Δ Depressive Mood <sup>2</sup>   | 0.86                               | 0.06              | 1.45              | 0.87                               | 0.27              | 3.19  | 0.98                               | 0.49              | 1.55              |
|                                      | Δ Fatigue <sup>2</sup>           | 1.03                               | 0.18              | 9.44              | 0.78                               | 0.18              | 2.95  | 1.00                               | 0.67              | 1.45              |
|                                      | Δ Pain Interference <sup>2</sup> | 0.95                               | 0.15              | 1.43              | 0.99                               | 0.51              | 1.35  | 1.00                               | 0.64              | 1.27              |
|                                      | Δ Sleep Quality <sup>2</sup>     | 0.88                               | 0.19              | 1.56              | 0.94                               | 0.39              | 1.21  | 0.97                               | 0.53              | 1.29              |
| <b>Sleep Quality<sup>1</sup></b>     |                                  |                                    |                   |                   |                                    |                   |       |                                    |                   |                   |
|                                      | Δ Anxiety <sup>2</sup>           | 0.99                               | 0.77              | 1.10              | 1.03                               | 0.91              | 1.49  | 0.99                               | 0.79              | 1.08              |
|                                      | Δ Depressive Mood <sup>2</sup>   | 0.89                               | 0.59              | 1.09              | 0.90                               | 0.62              | 1.35  | 1.00                               | 0.80              | 1.16              |
|                                      | Δ Fatigue <sup>2</sup>           | 0.90                               | 0.56              | 1.18              | 0.78                               | 0.46              | 1.06  | 1.02                               | 0.69              | 1.51              |
|                                      | Δ Pain Interference <sup>2</sup> | 0.87                               | 0.50              | 1.04              | 0.95                               | 0.68              | 1.13  | 1.00                               | 0.85              | 1.11              |
| <b>Pain Interference<sup>1</sup></b> |                                  |                                    |                   |                   |                                    |                   |       |                                    |                   |                   |
|                                      | Δ Anxiety <sup>2</sup>           | 1.01                               | 0.90              | 1.36              | 0.99                               | 0.70              | 1.23  | 0.98                               | 0.68              | 1.13              |
|                                      | Δ Depressive Mood <sup>2</sup>   | 0.95                               | 0.60              | 1.27              | 1.08                               | 0.50              | 1.96  | 1.02                               | 0.89              | 1.62              |
|                                      | Δ Fatigue <sup>2</sup>           | 0.88                               | 0.51              | 1.08              | 0.96                               | 0.60              | 1.54  | 1.04                               | 0.88              | 1.54              |
|                                      | Δ Sleep Quality <sup>2</sup>     | 0.94                               | 0.58              | 1.30              | 0.88                               | 0.48              | 1.06  | 0.97                               | 0.65              | 1.11              |
| <b>Fatigue<sup>1</sup></b>           |                                  |                                    |                   |                   |                                    |                   |       |                                    |                   |                   |
|                                      | Δ Anxiety <sup>2</sup>           | 1.02                               | 0.97              | 1.25              | 0.90                               | 0.67              | 1.01  | 0.97                               | 0.77              | 1.05              |
|                                      | Δ Depressive Mood <sup>2</sup>   | 0.80                               | 0.52              | 0.97              | 0.83                               | 0.57              | 1.01  | 1.04                               | 0.77              | 1.48              |
|                                      | Δ Pain Interference <sup>2</sup> | 0.89                               | 0.67              | 1.00              | 0.94                               | 0.73              | 1.05  | 1.00                               | 0.91              | 1.08              |
|                                      | Δ Sleep Quality <sup>2</sup>     | 0.80                               | 0.58              | 0.96              | 0.87                               | 0.64              | 1.00  | 0.96                               | 0.78              | 1.08              |

1. The table shows the estimate of mediation effect along with the associated confidence interval. An effect estimate significantly different from 1 indicates mediation

2. Patient Reported Outcomes Derived From: Anxiety = Hospital Anxiety Depression Scale Anxiety Subscale; Depression = Hospital Anxiety Depression Scale Depression Subscale; Fatigue = Brief Fatigue Inventory; Pain Interference = Brief Pain Inventory Interference Subscale; and Sleep Quality = Pittsburgh Sleep Quality Global Score.

2. UC = Usual Care Group; RA = Relaxing Acupressure Group; SA = Stimulating Acupressure Group; LLCI = Lower Limit Confidence Interval; and ULCI = Upper Limit Confidence Interval.

3. Estimates and Bias Corrected 95 % Bootstrapped Confidence Intervals (20,000 samples) derived from Logistic Regression using PROCESS Command SPSS

# Relaxation Acupressure Points

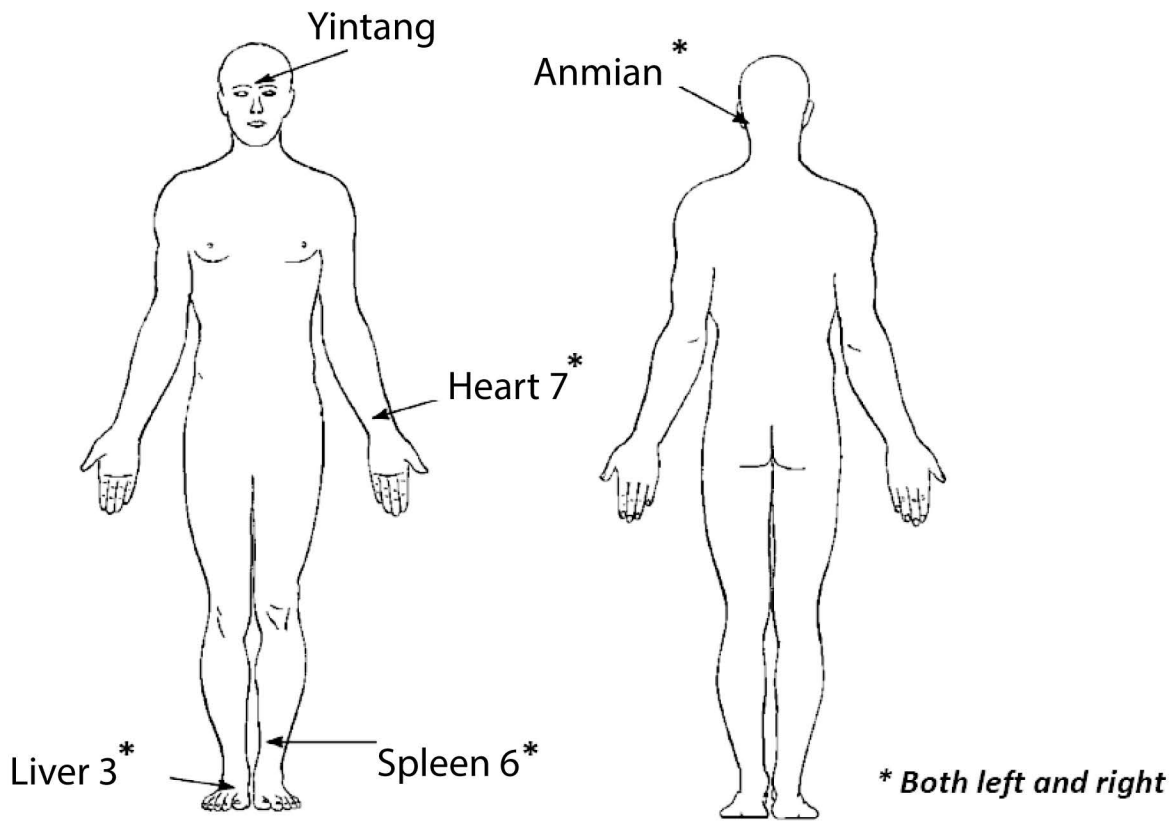

# Stimulation Acupressure Points

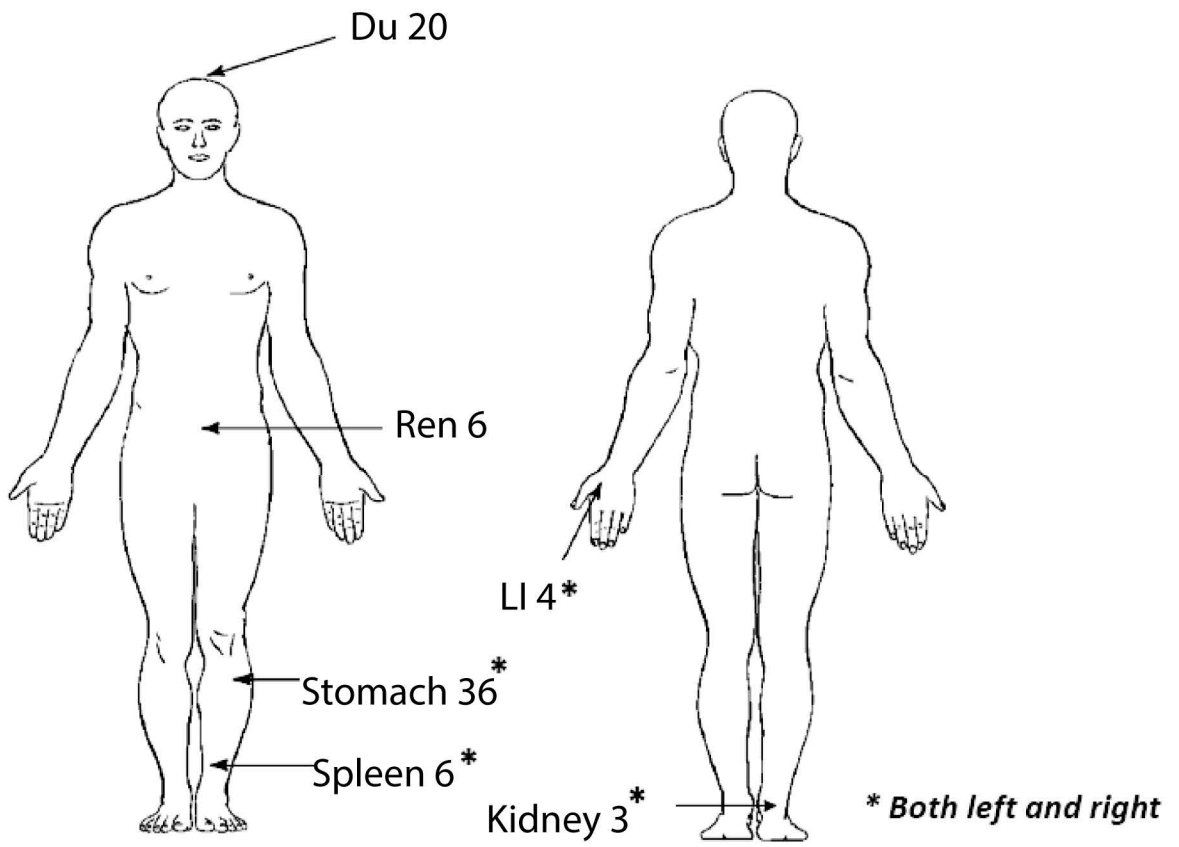

## Supplemental Figure 2

Consort Flow Diagram for Participants with Chronic Pain at Baseline (defined as VAS $\geq$ 3)

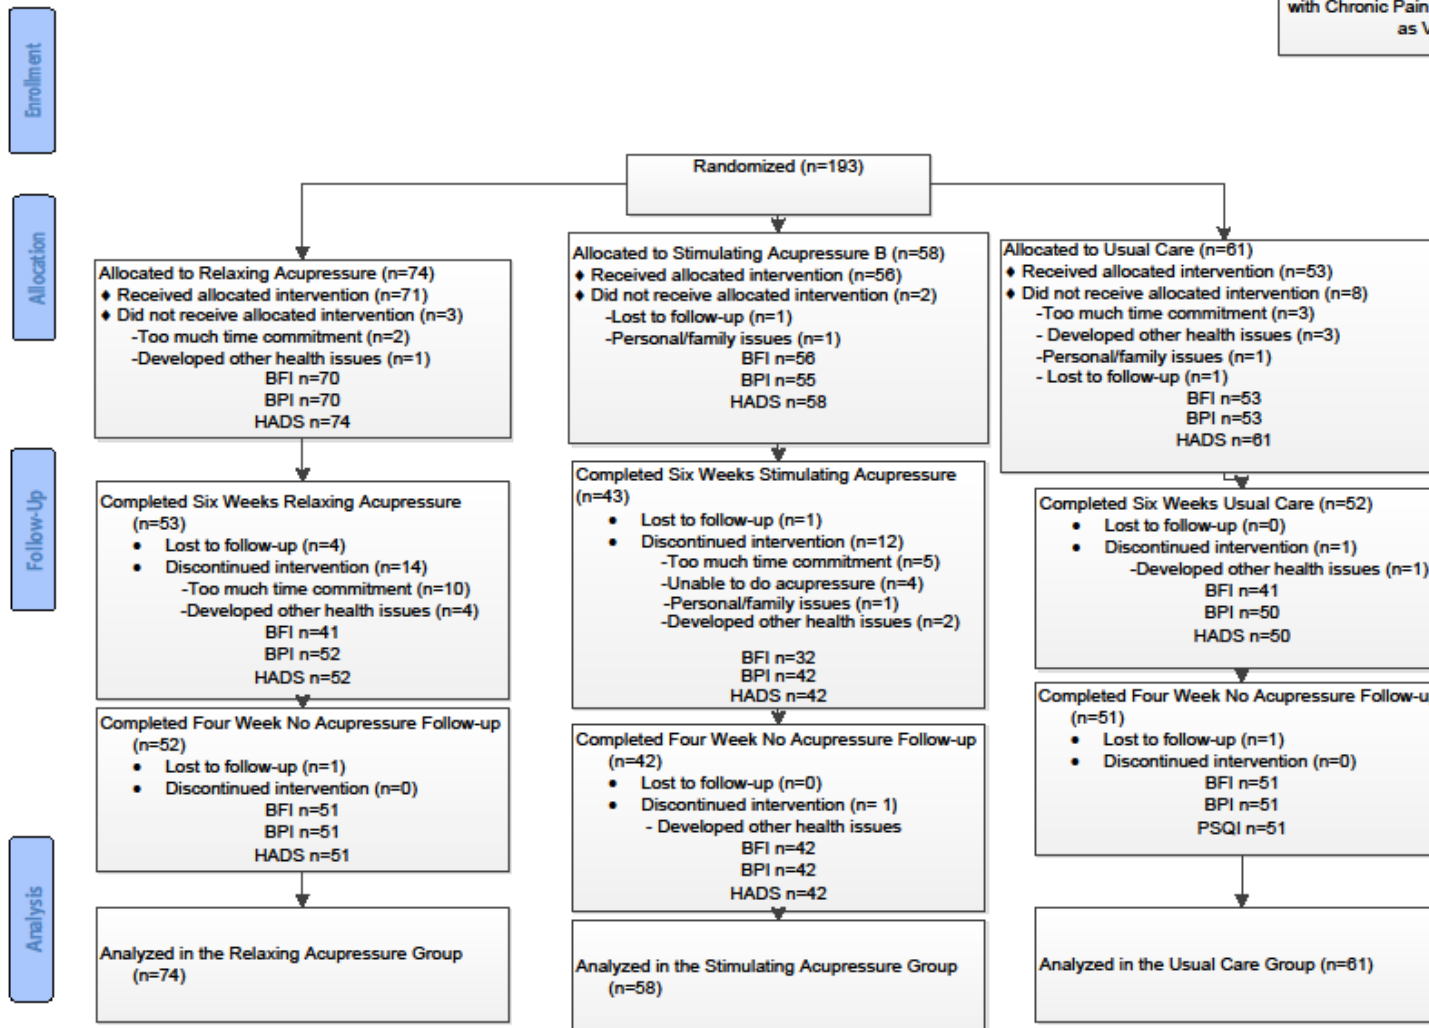

Supplemental Figure 3

Consort Flow Diagram for Participants with Anxiety at Baseline (defined as HADS≥8)

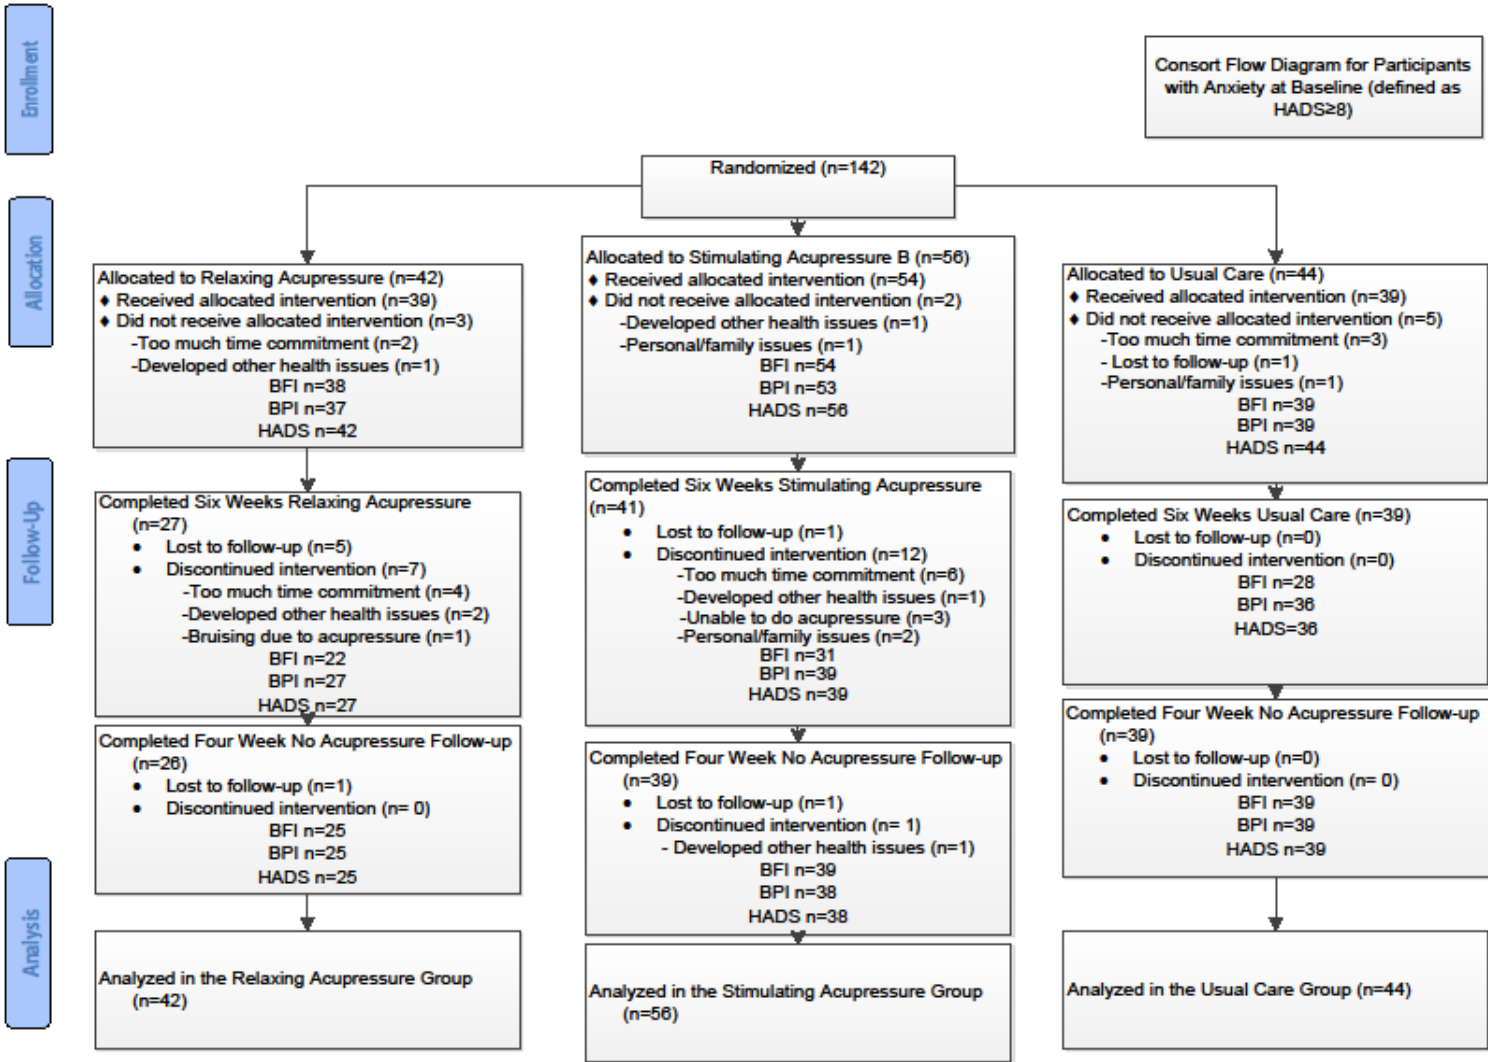

**Supplemental Figure 4**

Consort Flow Diagram for Participants with Depression at Baseline (defined as HADS≥8)

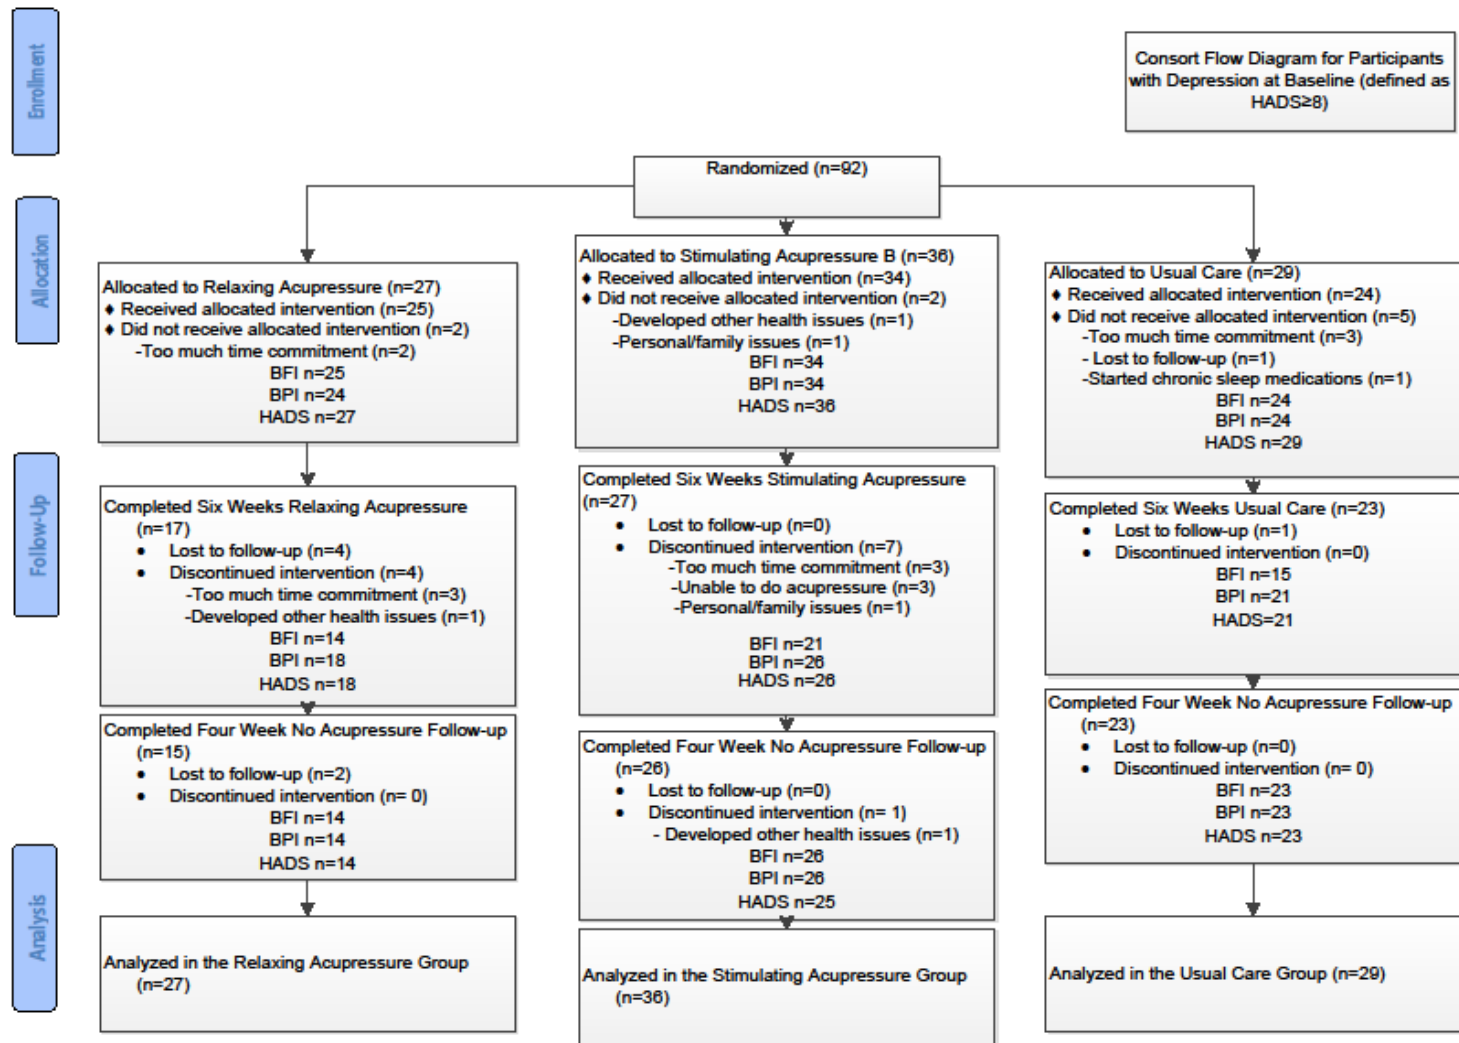



## **Supplemental Figure Legend**

**Supplemental Figure 1.** Location of relaxing and stimulating self-acupressure points. Points designated with an asterisk were performed on both the left and right hand sides of the body.

**Supplemental Figure 2.** Consort Flow Diagram for Participants with Chronic Pain at Baseline (Defined as Visual Analog Scale  $\geq 3$ ).

**Supplemental Figure 3.** Consort Flow Diagram for Participants with Anxiety at Baseline (defined as Hospital Anxiety Depression Anxiety Sub score, Defined as Score  $\geq 8$ ).

**Supplemental Figure 4.** Consort Flow Diagram for Participants with Depression at Baseline (defined as Hospital Anxiety Depression Sub score, Defined as Score  $\geq 8$ ).
